# Supplementary material for: Acarbose attenuates migration/proliferation via targeting microRNA-143 in vascular smooth muscle cells under diabetic conditions
Source: PubMed Central journal article supplement — J Food Drug Anal. 2020 Aug 28;28(3):461–74. doi: 10.38212/2224-6614.1241 (PMC9261793; doi:10.38212/2224-6614.1241), 2020-08-28
Supplement: jfda-28-03-461-s001.pdf [file jfda-28-03-461-s001.pdf]

1. A7r5 cells were discovered to promote cell proliferation/migration by oleic acid and high glucose.
2. Acarbose inhibiting oleic acid and high glucose enhanced vascular smooth muscle cell proliferation/migration.
3. Acarbose up-regulation of miR-143 attenuates the Ras-mediated FAK and PI3K/Akt pathway to improve VSMC migration and proliferation.
